# Supplementary material
Source: HighWire-hosted journal article supplement (https://rmdopen.bmj.com/content/7/3/e001737)
Supplement: inline-supplementary-material-1 [file inline-supplementary-material-1.pdf]

**Supplementary Table S1:** An overview of mean/median Cmax values of various disease-modifying antirheumatic drugs (DMARDs) described in the literature.

| DMARDs                          | Mean/median Cmax (µg/mL) | Study conc. (µg/mL) | Subjects                                                                                              | Dose                                                                   | References |
|---------------------------------|--------------------------|---------------------|-------------------------------------------------------------------------------------------------------|------------------------------------------------------------------------|------------|
| <b>Aurothiomalate/Auranofin</b> | 1.38                     | 1.4                 | Healthy volunteers                                                                                    | Population kinetics for 21 mg daily over 14 days                       | [1]        |
|                                 | 4                        |                     | Patients with rheumatoid arthritis                                                                    | First intramuscular injection of 50mg sodium aurothiomalate            | [2]        |
| <b>Azathioprine</b>             | 0.048                    | 0.05                | Healthy volunteers                                                                                    | Single dose of 100 mg p.o.                                             | [3]        |
| <b>Chloroquine</b>              | 0.494                    | 0.5                 | intermittent presumptive malaria treatment in pregnant and nonpregnant women                          | Three doses of 750mg chloroquine base each                             | [4]        |
| <b>D-Penicillamine</b>          | 1.22                     | 2.0                 | Patients with rheumatic arthritis                                                                     | Single dose of 250mg p.o.                                              | [5]        |
| <b>Hydroxychloroquine</b>       | 0.034                    | 0.05                | Healthy volunteers                                                                                    | Single dose of 200mg p.o.                                              | [6]        |
| <b>Leflunomide</b>              | 2.0                      | 2.0                 | Healthy volunteers                                                                                    | Single oral dose of 20mg Leflunomide                                   | [7]        |
| <b>Methotrexate</b>             | 0.323                    | 0.3                 | patients with psoriasis, psoriatic arthritis or rheumatoid arthritis on a stable dose of methotrexate | 10 mg p.o. once weekly                                                 | [8]        |
|                                 | 0.607                    |                     |                                                                                                       | 20 mg p.o. once weekly                                                 | [8]        |
|                                 | 0.229                    |                     | Healthy volunteers                                                                                    | Single dose of 10mg p.o.                                               | [*]        |
| <b>Sulfasalazine</b>            | 6.0                      | 6.0                 | Healthy volunteers                                                                                    | Single dose of 1000 mg p.o.                                            | [*1]       |
| <b>Sulfapyridine</b>            | 11.48                    |                     | Healthy volunteers                                                                                    | Single dose of 2000mg (4x500mg) p.o.                                   | [9]        |
| <b>Tofacitinib</b>              | 0.038                    | 0.05                | Healthy volunteers                                                                                    | Multiple dose phase with 11 mg extended release tofacitinib once daily | [10]       |
| <b>ANTIBIOTICS</b>              |                          |                     |                                                                                                       |                                                                        |            |
| <b>Cefuroxime</b>               | 100                      | 100                 | Healthy volunteers                                                                                    | Single dose of 1500 mg i.v.                                            | [*]        |
|                                 | ~100                     |                     | Healthy volunteers                                                                                    |                                                                        | [11]       |
| <b>Benzylpenicillin</b>         | 240                      | 240                 | n.a.                                                                                                  | Single dose of 5 mio IE i.v.                                           | [*]        |

\*DMARDs, disease-modifying antirheumatic drugs; Cmax, maximum serum concentration; Study conc., Drug concentrations used as 1x Cmax for antimicrobial activity testing in this study

**References:**

- 1 Capparelli EV, Bricker-Ford R, Rogers MJ, *et al.* Phase I Clinical Trial Results of Auranofin, a Novel Antiparasitic Agent. *Antimicrobial Agents and Chemotherapy* 2017;**61**. doi:10.1128/AAC.01947-16
- 2 Rubinstein HM, Dietz AA. Serum gold. II. Levels in rheumatoid arthritis. *Ann Rheum Dis* 1973;**32**:128–32.
- 3 Shi S-J, Li Z-F, Chen H-T, *et al.* Pharmacokinetics and bioequivalence evaluation of azathioprine in healthy Chinese volunteers. ;:6.
- 4 Karunajeewa HA, Salman S, Mueller I, *et al.* Pharmacokinetics of chloroquine and monodesethylchloroquine in pregnancy. *Antimicrob Agents Chemother* 2010;**54**:1186–92. doi:10.1128/AAC.01269-09
- 5 Butler M, Carruthers G, Harth M, *et al.* Pharmacokinetics of reduced D-penicillamine in patients with rheumatoid arthritis. *Arthritis Rheum* 1982;**25**:111–6. doi:10.1002/art.1780250120
- 6 Fan H-W, Ma Z-X, Chen J, *et al.* Pharmacokinetics and Bioequivalence Study of Hydroxychloroquine Sulfate Tablets in Chinese Healthy Volunteers by LC-MS/MS. *Rheumatol Ther* 2015;**2**:183–95. doi:10.1007/s40744-015-0012-0
- 7 Li J, Yao H-W, Jin Y, *et al.* Pharmacokinetics of leflunomide in Chinese healthy volunteers. *Acta Pharmacol Sin* 2002;**23**:551–5.
- 8 Liu Y, Zhou S, Nissel J, *et al.* The pharmacokinetic effect of coadministration of apremilast and methotrexate in individuals with rheumatoid arthritis and psoriatic arthritis. *Clin Pharmacol Drug Dev* 2014;**3**:456–65. doi:10.1002/cpdd.109
- 9 Bates TR, Blumenthal HP, Pieniaszek HJ. Salivary excretion and pharmacokinetics of sulfapyridine after sulfasalazine. *Clin Pharmacol Ther* 1977;**22**:917–27. doi:10.1002/cpt1977226917
- 10 Lamba M, Wang R, Fletcher T, *et al.* Extended-Release Once-Daily Formulation of Tofacitinib: Evaluation of Pharmacokinetics Compared With Immediate-Release Tofacitinib and Impact of Food. *J Clin Pharmacol* 2016;**56**:1362–71. doi:10.1002/jcph.734
- 11 Thønnings S, Jensen KS, Nielsen NB, *et al.* Cefuroxime pharmacokinetics and pharmacodynamics for intravenous dosage regimens with 750 mg or 1500 mg doses in healthy young volunteers. *J Med Microbiol* Published Online First: 20 January 2020. doi:10.1099/jmm.0.001138

\*Summary of product characteristics

**Supplementary Table S2.** Minimum inhibitory concentrations (MICs) presented as multiple times of the peak serum concentration (C<sub>max</sub>) of all disease-modifying anti rheumatic drugs (DMARDs) which demonstrated antimicrobial activity in the diffusion disk screening assay against respective bacterial species.

| Bacteria                        | ATM <sup>1</sup>      | AZA | DPM | CQ | HCQ | LEF | MTX <sup>1</sup>      | SSZ <sup>1</sup>      | TOF |
|---------------------------------|-----------------------|-----|-----|----|-----|-----|-----------------------|-----------------------|-----|
| <b>Anaerobic bacteria</b>       |                       |     |     |    |     |     |                       |                       |     |
| <b>Actinomyces spp.</b>         |                       |     |     |    |     |     |                       |                       |     |
| <i>A. naeslundii</i> DSMZ 43013 | >70xC <sub>max</sub>  | -   | -   | -  | -   | -   | -                     | >100xC <sub>max</sub> | -   |
| <i>A. israelii</i>              | >70xC <sub>max</sub>  | -   | -   | -  | -   | -   | -                     | >100xC <sub>max</sub> | -   |
| <i>A. israelii</i>              | 17.5xC <sub>max</sub> | -   | -   | -  | -   | -   | -                     | >100xC <sub>max</sub> | -   |
| <i>A. oris</i>                  | >70xC <sub>max</sub>  | -   | -   | -  | -   | -   | -                     | >100xC <sub>max</sub> | -   |
| <i>A. oris</i>                  | >70xC <sub>max</sub>  | -   | -   | -  | -   | -   | -                     | 50xC <sub>max</sub>   | -   |
| <i>A. oris</i>                  | 35xC <sub>max</sub>   | -   | -   | -  | -   | -   | -                     | >100xC <sub>max</sub> | -   |
| <b>Capnocytophaga spp.</b>      |                       |     |     |    |     |     |                       |                       |     |
| <i>C. sputigena</i> DSMZ 7273   | 8.8xC <sub>max</sub>  | -   | -   | -  | -   | -   | -                     | 100xC <sub>max</sub>  | -   |
| <i>C. gingivalis</i>            | 4.4xC <sub>max</sub>  | -   | -   | -  | -   | -   | -                     | 100xC <sub>max</sub>  | -   |
| <i>C. granulosa</i>             | >70xC <sub>max</sub>  | -   | -   | -  | -   | -   | -                     | >100xC <sub>max</sub> | -   |
| <i>C. granulosa</i>             | 8.8xC <sub>max</sub>  | -   | -   | -  | -   | -   | -                     | >100xC <sub>max</sub> | -   |
| <i>C. granulosa</i>             | 4.4xC <sub>max</sub>  | -   | -   | -  | -   | -   | -                     | >100xC <sub>max</sub> | -   |
| <i>C. ochracea</i>              | >70xC <sub>max</sub>  | -   | -   | -  | -   | -   | -                     | >100xC <sub>max</sub> | -   |
| <b>Eikenella spp.</b>           |                       |     |     |    |     |     |                       |                       |     |
| <i>E. corrodens</i> DSMZ 8340   | 4.4xC <sub>max</sub>  | -   | -   | -  | -   | -   | -                     | >100xC <sub>max</sub> | -   |
| <i>E. corrodens</i>             | >70xC <sub>max</sub>  | -   | -   | -  | -   | -   | -                     | >100xC <sub>max</sub> | -   |
| <i>E. corrodens</i>             | >70xC <sub>max</sub>  | -   | -   | -  | -   | -   | -                     | >100xC <sub>max</sub> | -   |
| <i>E. corrodens</i>             | >70xC <sub>max</sub>  | -   | -   | -  | -   | -   | -                     | >100xC <sub>max</sub> | -   |
| <i>E. corrodens</i>             | >70xC <sub>max</sub>  | -   | -   | -  | -   | -   | -                     | >100xC <sub>max</sub> | -   |
| <i>E. corrodens</i>             | 17.5xC <sub>max</sub> | -   | -   | -  | -   | -   | -                     | 50xC <sub>max</sub>   | -   |
| <b>Fusobacterium spp.</b>       |                       |     |     |    |     |     |                       |                       |     |
| <i>F. nucleatum</i> DSMZ 15643  | 70xC <sub>max</sub>   | -   | -   | -  | -   | -   | >100xC <sub>max</sub> | 50xC <sub>max</sub>   | -   |
| <i>F. nucleatum</i>             | 17.5xC <sub>max</sub> | -   | -   | -  | -   | -   | 100xC <sub>max</sub>  | 25xC <sub>max</sub>   | -   |
| <i>F. nucleatum</i>             | 8.8xC <sub>max</sub>  | -   | -   | -  | -   | -   | >100xC <sub>max</sub> | 50xC <sub>max</sub>   | -   |
| <i>F. nucleatum</i>             | 17.5xC <sub>max</sub> | -   | -   | -  | -   | -   | 100xC <sub>max</sub>  | 25xC <sub>max</sub>   | -   |
| <i>F. nucleatum</i>             | 8.8xC <sub>max</sub>  | -   | -   | -  | -   | -   | 50xC <sub>max</sub>   | 50xC <sub>max</sub>   | -   |
| <i>F. nucleatum</i>             | 4.4xC <sub>max</sub>  | -   | -   | -  | -   | -   | 12.5xC <sub>max</sub> | 50xC <sub>max</sub>   | -   |
| <b>Parvimonas spp.</b>          |                       |     |     |    |     |     |                       |                       |     |
| <i>P. micra</i> DSMZ 20468      | 17.5xC <sub>max</sub> | -   | -   | -  | -   | -   | -                     | -                     | -   |
| <i>P. micra</i>                 | 35xC <sub>max</sub>   | -   | -   | -  | -   | -   | -                     | -                     | -   |
| <i>P. micra</i>                 | >70xC <sub>max</sub>  | -   | -   | -  | -   | -   | -                     | -                     | -   |
| <i>P. micra</i>                 | >70xC <sub>max</sub>  | -   | -   | -  | -   | -   | -                     | -                     | -   |
| <i>P. micra</i>                 | >70xC <sub>max</sub>  | -   | -   | -  | -   | -   | -                     | -                     | -   |
| <i>P. micra</i>                 | 35xC <sub>max</sub>   | -   | -   | -  | -   | -   | -                     | -                     | -   |
| <b>Prevotella spp.</b>          |                       |     |     |    |     |     |                       |                       |     |
| <i>P. intermedia</i> DSMZ 20706 | >70xC <sub>max</sub>  | -   | -   | -  | -   | -   | -                     | -                     | -   |
| <i>P. intermedia</i>            | >70xC <sub>max</sub>  | -   | -   | -  | -   | -   | -                     | -                     | -   |
| <i>P. intermedia</i>            | >70xC <sub>max</sub>  | -   | -   | -  | -   | -   | -                     | -                     | -   |
| <i>P. intermedia</i>            | >70xC <sub>max</sub>  | -   | -   | -  | -   | -   | -                     | -                     | -   |
| <i>P. intermedia</i>            | >70xC <sub>max</sub>  | -   | -   | -  | -   | -   | -                     | -                     | -   |
| <i>P. intermedia</i>            | >70xC <sub>max</sub>  | -   | -   | -  | -   | -   | -                     | -                     | -   |
| <b>Porphyromonas spp.</b>       |                       |     |     |    |     |     |                       |                       |     |
| <i>P. gingivalis</i> DSMZ 20709 | 8.8xC <sub>max</sub>  | -   | -   | -  | -   | -   | -                     | 25xC <sub>max</sub>   | -   |
| <i>P. gingivalis</i>            | 17.5xC <sub>max</sub> | -   | -   | -  | -   | -   | -                     | 100xC <sub>max</sub>  | -   |
| <i>P. gingivalis</i>            | 35xC <sub>max</sub>   | -   | -   | -  | -   | -   | -                     | >100xC <sub>max</sub> | -   |
| <i>P. gingivalis</i>            | 17.5xC <sub>max</sub> | -   | -   | -  | -   | -   | -                     | 100xC <sub>max</sub>  | -   |
| <i>P. gingivalis</i>            | 4.4xC <sub>max</sub>  | -   | -   | -  | -   | -   | -                     | 50xC <sub>max</sub>   | -   |
| <i>P. gingivalis</i>            | 8.8xC <sub>max</sub>  | -   | -   | -  | -   | -   | -                     | 50xC <sub>max</sub>   | -   |
| <b>Streptococci</b>             |                       |     |     |    |     |     |                       |                       |     |
| <b>Streptococcus spp.</b>       |                       |     |     |    |     |     |                       |                       |     |

***Anginosus group***

|                     |          |   |   |   |   |   |           |   |   |
|---------------------|----------|---|---|---|---|---|-----------|---|---|
| <i>S. anginosus</i> | >70xCmax | - | - | - | - | - | 1.56xCmax | - | - |
|---------------------|----------|---|---|---|---|---|-----------|---|---|

***Mitis group***

|                         |          |   |   |   |   |   |           |   |   |
|-------------------------|----------|---|---|---|---|---|-----------|---|---|
| <i>S. parasanguinis</i> | >70xCmax | - | - | - | - | - | 1.56xCmax | - | - |
| <i>S. parasanguinis</i> | >70xCmax | - | - | - | - | - | 12.5xCmax | - | - |
| <i>S. sanguinis</i>     | >70xCmax | - | - | - | - | - | 1.56xCmax | - | - |
| <i>S. sanguinis</i>     | >70xCmax | - | - | - | - | - | 3.13xCmax | - | - |

***Salivarius group***

|                                |          |   |   |   |   |   |           |   |   |
|--------------------------------|----------|---|---|---|---|---|-----------|---|---|
| <i>S. salivarius</i> ATCC 7073 | >70xCmax | - | - | - | - | - | 12.5xCmax | - | - |
| <i>S. salivarius</i>           | >70xCmax | - | - | - | - | - | 50xCmax   | - | - |
| <i>S. vestibularis</i>         | >70xCmax | - | - | - | - | - | 50xCmax   | - | - |

**Aerobic bacteria*****Escherichia coli***

|                           |          |   |   |   |   |   |   |   |   |
|---------------------------|----------|---|---|---|---|---|---|---|---|
| <i>E. coli</i> ATCC 25922 | >70xCmax | - | - | - | - | - | - | - | - |
| <i>E. coli</i>            | >70xCmax | - | - | - | - | - | - | - | - |
| <i>E. coli</i>            | >70xCmax | - | - | - | - | - | - | - | - |
| <i>E. coli</i>            | 35xCmax  | - | - | - | - | - | - | - | - |
| <i>E. coli</i>            | >70xCmax | - | - | - | - | - | - | - | - |
| <i>E. coli</i>            | >70xCmax | - | - | - | - | - | - | - | - |

***Proteus mirabilis***

|                                |          |   |   |   |   |   |   |   |   |
|--------------------------------|----------|---|---|---|---|---|---|---|---|
| <i>P. mirabilis</i> ATCC 14273 | >70xCmax | - | - | - | - | - | - | - | - |
| <i>P. mirabilis</i>            | >70xCmax | - | - | - | - | - | - | - | - |
| <i>P. mirabilis</i>            | >70xCmax | - | - | - | - | - | - | - | - |
| <i>P. mirabilis</i>            | >70xCmax | - | - | - | - | - | - | - | - |
| <i>P. mirabilis</i>            | >70xCmax | - | - | - | - | - | - | - | - |
| <i>P. mirabilis</i>            | >70xCmax | - | - | - | - | - | - | - | - |

***Staphylococcus aureus***

|                             |          |   |   |   |   |   |   |   |   |
|-----------------------------|----------|---|---|---|---|---|---|---|---|
| <i>S. aureus</i> ATCC 29213 | >70xCmax | - | - | - | - | - | - | - | - |
| <i>S. aureus</i>            | >70xCmax | - | - | - | - | - | - | - | - |
| <i>S. aureus</i>            | >70xCmax | - | - | - | - | - | - | - | - |
| <i>S. aureus</i>            | >70xCmax | - | - | - | - | - | - | - | - |
| <i>S. aureus</i>            | >70xCmax | - | - | - | - | - | - | - | - |
| <i>S. aureus</i>            | >70xCmax | - | - | - | - | - | - | - | - |

\*ATM, Aurothiomalate; AZA, Azathioprine; CQ, Chloroquine; HCQ, Hydroxychloroquine; DPM, D-Penicillamine; LEF, Leflunomide; MTX, Methotrexate; SSZ, Sulfasalazine; TOF, Tofacitinib; DSMZ, German Collection of Microorganisms and Cell cultures GmbH; *A. israelii*, *Actinomyces israelii*; *A. naeslundii*, *Actinomyces naeslundii*; *A. oris*, *Actinomyces oris*; *C. gingivalis*, *Capnocytophaga gingivalis*; *C. granulosa*, *Capnocytophaga granulosa*; *C. ochracea*, *Capnocytophaga ochracea*; *E. corrodens*, *Eikenella corrodens*; *F. nucleatum*, *Fusobacterium nucleatum*; *P. micra*, *Parvimonas micra*; *P. intermedia*, *Prevotella intermedia*; *P. gingivalis*, *Porphyromonas gingivalis*; *S. anginosus*, *Streptococcus anginosus*; *S. parasanguinis*, *Streptococcus parasanguinis*; *S. sanguinis*, *Streptococcus sanguinis*; ATCC, American Type Culture Collection; *S. salivarius*, *Streptococcus salivarius*; *S. vestibularis*, *Streptococcus vestibularis*; *E. coli*, *Escherichia coli*; *P. mirabilis*, *Proteus mirabilis*; *S. aureus*, *Staphylococcus aureus*; Cmax, maximum serum concentration; n.a., not applicable because no antimicrobial activity was observed in the agar diffusion screening assay

<sup>1</sup> The concentrations used to calculate the minimum inhibitory concentrations as multiple times of the peak serum levels were as follows: ATM 4µg/mL, MTX 0.3µg/mL, SSZ 6µg/mL.
